# Supplementary material for: Anatase TiO2 nanosheets with exposed highly reactive (001) facets as an efficient photoanode for quantum dot-sensitized solar cells
Source: Royal Society of Chemistry journal article supplement (doi:10.1039/c6ra10628e), 2016-01-01
Supplement: c6ra10628e1.pdf [file c6ra10628e1.pdf]

## Supporting Information

Anatase TiO<sub>2</sub> nanosheets with exposed highly reactive (001) faces as an efficient photoanode for quantum dot-sensitized solar cells

Hai Tao Zhou<sup>a</sup>, Lin Li<sup>a,\*</sup>, Dian Li Jiang<sup>a</sup>, Ying Bing Lu<sup>a</sup> and Kai Pan<sup>b</sup>

<sup>a</sup>Key Laboratory for Photonic and Electronic Bandgap Materials, Ministry of Education, School of Physics and Electronic Engineering, Harbin Normal University, Harbin 150025, PR China.

<sup>b</sup>Key Laboratory of Functional Inorganic Material Chemistry, Ministry of Education, Heilongjiang University, Harbin 150080, PR China.

\* Corresponding author.

E-mail: [physics\\_lin@hotmail.com](mailto:physics_lin@hotmail.com) (L. Li)

On the basis of the SEM and TEM results in our manuscript, the TiO<sub>2</sub>-NSs can be approximately regarded as the square sheet, the percentage of exposed (001) crystal planes can be roughly calculated by the following equation.

$$\text{Percentage} = \frac{\text{Length} \times \text{Width} \times 2}{\text{Length} \times \text{Width} \times 2 + \text{Length} \times \text{Thickness} \times 2 + \text{Width} \times \text{Thickness} \times 2}$$

**Table S1.** the percentage of exposed (001) crystal planes in single TiO<sub>2</sub> nanosheet.

| <i>TiO<sub>2</sub> nanosheets</i>                                                 | <i>Length(nm)</i> | <i>Width(nm)</i> | <i>Thickness(nm)</i> | <i>Percentage</i> |
|-----------------------------------------------------------------------------------|-------------------|------------------|----------------------|-------------------|
|                                                                                   | ~30               | ~30              | ~5.7nm               | ~72%              |
|                                                                                   | ~40               | ~40              | ~5.7nm               | ~78%              |
| 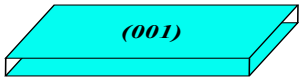 | ~50               | ~50              | ~5.7nm               | ~81%              |
|                                                                                   | ~60               | ~60              | ~5.7nm               | ~84%              |
|                                                                                   | ~70               | ~70              | ~5.7nm               | ~86%              |

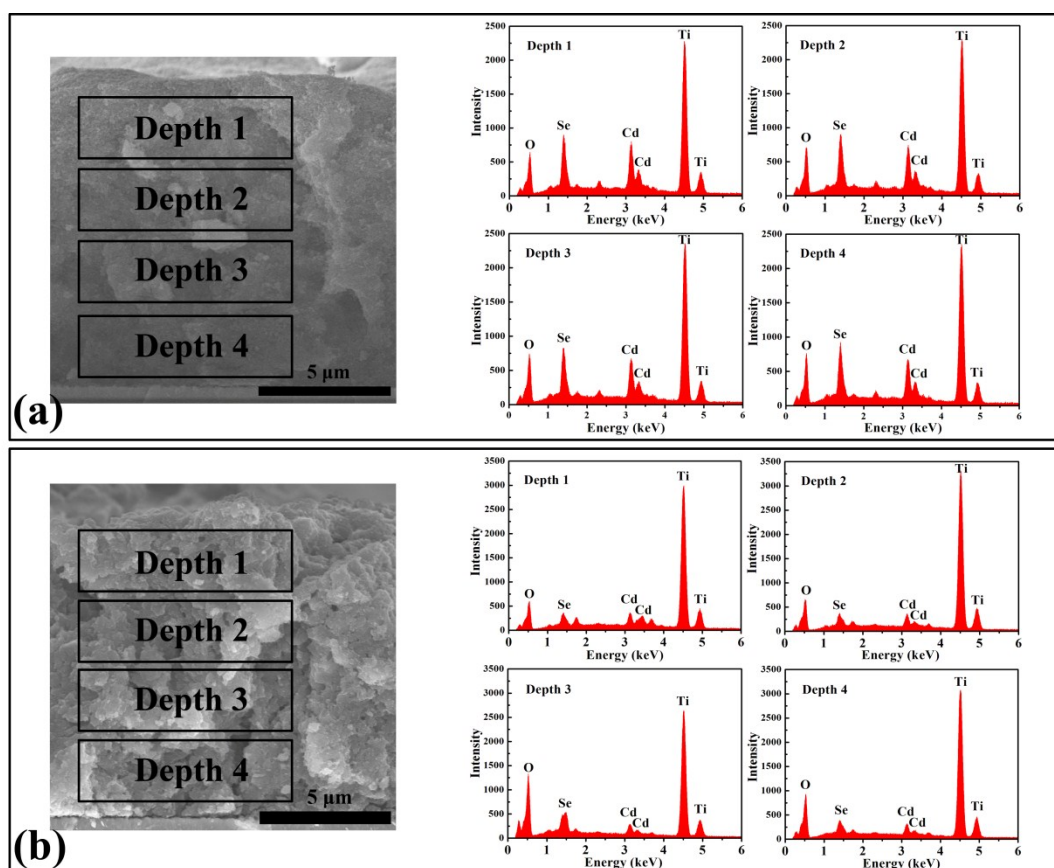

**Figure S1.** EDX images corresponding to different depths of the TiO<sub>2</sub>-NSs/CdSe film (a) and TiO<sub>2</sub>-NPs/ CdSe film (b).

**Table S2** Comparison of physical properties of TiO<sub>2</sub>-NSs, TiO<sub>2</sub>-NPs.<sup>a</sup>

| Samples | fwhm | Crystallite<br>size/nm | Relative<br>crystallinity | S <sub>BET</sub> /m <sup>2</sup> g <sup>-1</sup> | Maximum<br>pore size/nm |
|---------|------|------------------------|---------------------------|--------------------------------------------------|-------------------------|
| NP      | 0.91 | 9 (A)                  | 1                         | 133                                              | 7.8                     |
| NS      | 0.62 | 13 (A)                 | 1.26                      | 85                                               | 12.4                    |

<sup>a</sup> A: anatase. Relative anatase crystallinity: the relative intensity of the diffraction peak from the anatase (101) plane (reference = TiO<sub>2</sub>-NPs).

**Table S3** Detailed photovoltaic parameters of QDSSCs based on different photoanodes.

| <b>Photoanode</b> | <b><math>J_{sc}</math> (mA/cm<sup>2</sup>)</b> | <b><math>V_{oc}</math> (mV)</b> | <b><math>FF</math> (%)</b> | <b><math>\eta</math> (%)</b> |
|-------------------|------------------------------------------------|---------------------------------|----------------------------|------------------------------|
| NP                | 12.60                                          | 582                             | 0.42                       | 3.08                         |
| NS                | 16.95                                          | 591                             | 0.50                       | 5.01                         |

**Table S4** Electrochemical impedance results of QDSSCs.

| <b>Photoanode</b> | <b><math>R_s</math> (<math>\Omega</math>)</b> | <b><math>R_2</math> (<math>\Omega</math>)</b> | <b><math>\tau_r</math> (ms)</b> |
|-------------------|-----------------------------------------------|-----------------------------------------------|---------------------------------|
| NP                | 16.35                                         | 61.39                                         | 65                              |
| NS                | 14.79                                         | 144.52                                        | 142                             |
